# Supplementary material
Source: MDPI journal article supplement (https://www.mdpi.com/2073-4441/12/4/1215)
Supplement: s1 [file s1]

# Supplementary materials

**Table S1.** Abiotic variables at the catchment scale.

| Stream | Urban (%) | Sugarcane (%) | Forest (%) | Agriculture (%) | Pasture (%) | Area (km <sup>2</sup> ) | Length (km) |
|--------|-----------|---------------|------------|-----------------|-------------|-------------------------|-------------|
| s01    | 0.00      | 39.29         | 23.87      | 0.00            | 36.85       | 3.17                    | 2.07        |
| s02    | 0.00      | 66.69         | 1.11       | 0.00            | 32.20       | 1.07                    | 0.53        |
| s03    | 2.58      | 26.15         | 7.73       | 0.00            | 63.55       | 7.76                    | 4.39        |
| s04    | 0.00      | 59.57         | 13.12      | 0.00            | 27.31       | 7.63                    | 3.17        |
| s05    | 0.00      | 23.65         | 24.02      | 0.00            | 52.33       | 3.43                    | 1.75        |
| s07    | 13.61     | 26.18         | 11.19      | 0.00            | 49.01       | 4.57                    | 2.65        |
| s08    | 0.02      | 59.29         | 36.92      | 2.72            | 1.05        | 3.98                    | 1.96        |
| s09    | 4.42      | 68.67         | 24.14      | 0.22            | 2.54        | 5.48                    | 1.96        |
| s10    | 0.00      | 62.4          | 17.17      | 0.07            | 20.36       | 4.01                    | 1.28        |
| s11    | 0.00      | 77.09         | 4.90       | 0.35            | 17.66       | 6.68                    | 2.17        |
| s12    | 0.00      | 62.19         | 25.43      | 8.97            | 3.42        | 1.55                    | 0.99        |
| s13    | 0.00      | 76.78         | 10.27      | 0.00            | 12.95       | 1.68                    | 0.87        |
| s14    | 0.00      | 17.10         | 34.21      | 0.27            | 48.41       | 6.11                    | 2.17        |
| s15    | 0.00      | 4.50          | 51.95      | 0.14            | 43.40       | 4.14                    | 0.81        |
| s17    | 18.30     | 19.55         | 5.48       | 0.00            | 56.68       | 2.75                    | 1.49        |
| s18    | 86.50     | 8.74          | 2.56       | 0.00            | 2.21        | 2.74                    | 0.80        |
| s20    | 0.00      | 15.30         | 43.34      | 19.25           | 22.12       | 10.13                   | 3.12        |
| s21    | 0.00      | 5.58          | 48.12      | 16.56           | 29.74       | 17.94                   | 3.43        |
| s22    | 0.00      | 87.42         | 0.99       | 2.65            | 8.95        | 5.41                    | 2.78        |
| s23    | 0.00      | 72.07         | 5.84       | 0.65            | 21.44       | 8.13                    | 4.75        |
| s24    | 0.00      | 10.49         | 41.73      | 0.40            | 47.37       | 4.31                    | 3.19        |
| s25    | 0.00      | 20.87         | 21.73      | 12.48           | 44.92       | 5.20                    | 3.15        |
| s27    | 0.00      | 11.48         | 2.23       | 0.26            | 86.03       | 5.23                    | 2.82        |

**Table S2.** Local abiotic variables.

| Stream | Width (m) | Depth (m) | Slope (°) | Dissolved oxygen (mg/L) | Temperature (°C) | Velocity (m/s) | pH   | Conductivity (µS/m) | Turbidity (NTU) |
|--------|-----------|-----------|-----------|-------------------------|------------------|----------------|------|---------------------|-----------------|
| s01    | 2.00      | 0.07      | 3.55      | 7.28                    | 24.0             | 0.09           | 6.33 | 36.5                | 4.97            |

|     |      |      |      |      |      |      |      |       |       |
|-----|------|------|------|------|------|------|------|-------|-------|
| s02 | 2.59 | 0.25 | 2.70 | 7.79 | 21.9 | 0.30 | 6.49 | 36.1  | 11.73 |
| s03 | 1.62 | 0.32 | 4.12 | 7.56 | 21.3 | 0.93 | 6.45 | 66.4  | 8.36  |
| s04 | 2.12 | 0.31 | 2.85 | 7.65 | 23.0 | 0.15 | 6.22 | 22.4  | 8.43  |
| s05 | 3.82 | 0.11 | 2.73 | 6.26 | 24.6 | 0.16 | 5.69 | 16.6  | 35.53 |
| s07 | 2.65 | 0.13 | 2.76 | 7.30 | 23.3 | 0.48 | 6.48 | 74.5  | 25.3  |
| s08 | 3.00 | 0.26 | 3.93 | 7.28 | 23.3 | 0.23 | 6.88 | 81.5  | 13.7  |
| s09 | 4.63 | 0.19 | 2.56 | 7.43 | 22.7 | 0.23 | 6.57 | 41.8  | 10.74 |
| s10 | 1.38 | 0.27 | 3.10 | 7.26 | 23.8 | 0.29 | 5.83 | 28.3  | 4.96  |
| s11 | 2.24 | 0.17 | 2.99 | 7.30 | 23.8 | 0.58 | 5.44 | 51.5  | 10.93 |
| s12 | 0.85 | 0.06 | 4.50 | 7.38 | 22.6 | 0.15 | 6.52 | 42.0  | 12.44 |
| s13 | 1.60 | 0.10 | 3.76 | 7.15 | 23.7 | 0.20 | 5.82 | 30.8  | 6.06  |
| s14 | 1.19 | 0.16 | 2.61 | 7.34 | 24.0 | 0.41 | 6.28 | 21.6  | 7.76  |
| s15 | 1.30 | 0.20 | 3.14 | 5.65 | 24.1 | 0.29 | 5.54 | 28.9  | 4.28  |
| s17 | 1.49 | 0.11 | 2.97 | 7.29 | 23.8 | 0.82 | 6.71 | 96.5  | 156.0 |
| s18 | 0.80 | 0.08 | 2.64 | 5.46 | 23.9 | 0.20 | 6.83 | 248.0 | 7.41  |
| s20 | 3.12 | 0.22 | 3.08 | 7.35 | 23.5 | 0.24 | 5.96 | 30.4  | 3.85  |
| s21 | 1.65 | 0.29 | 3.21 | 7.35 | 23.1 | 0.43 | 5.69 | 36.2  | 2.8   |
| s22 | 2.83 | 0.18 | 3.13 | 7.32 | 23.2 | 0.13 | 5.76 | 25.6  | 3.61  |
| s23 | 2.76 | 0.18 | 2.36 | 6.70 | 24.0 | 0.24 | 5.87 | 14.9  | 17.01 |
| s24 | 4.74 | 0.51 | 3.65 | 7.37 | 22.9 | 0.23 | 5.79 | 46.1  | 11.52 |
| s25 | 2.11 | 0.20 | 3.83 | 7.18 | 23.9 | 0.20 | 6.23 | 43.5  | 37.4  |
| s27 | 1.27 | 0.18 | 2.77 | 7.06 | 24.1 | 0.33 | 5.67 | 26.2  | 21.5  |

**Table S3.** Rapid Assessment Protocol adapted to the study region (Cionek, V. M., Beaumord, A. C., & Benedito E., 2011). All parameters were visually evaluated and scored from zero (worst condition) to 20 (optimum condition). The mean value of all parameters was used as the stream local condition.

| Parameter                     | Background                                                                                                                                                                                                                                                                                                                        | Evaluation                                                                                                                                           |
|-------------------------------|-----------------------------------------------------------------------------------------------------------------------------------------------------------------------------------------------------------------------------------------------------------------------------------------------------------------------------------|------------------------------------------------------------------------------------------------------------------------------------------------------|
| Underwater available cover    | Greater variety and / or mixture of suitable cover available for different biotic communities.                                                                                                                                                                                                                                    | Proportion of underwater aquatic vegetation, organic material, trunks, branches and leaves.                                                          |
| Underwater habitat complexity | Habitat diversity along the stretch promotes higher spatial heterogeneity. The presence of excavated banks, stable mixture of trunks, branches and leaves in contact with water, create backwaters, small lagoons and small waterfalls; all these habitats could be available for the aquatic biota as refuge, food and spawning. | Marginal vegetation inclined over the channel, presence of backwaters, small waterfalls and excavated banks distributed along the evaluated section. |

|                                              |                                                                                                                                                                                                                                                                                                                                                                                                                                                                                                                                                                                                                              |                                                                                                                                                                                                                                                                                                                       |
|----------------------------------------------|------------------------------------------------------------------------------------------------------------------------------------------------------------------------------------------------------------------------------------------------------------------------------------------------------------------------------------------------------------------------------------------------------------------------------------------------------------------------------------------------------------------------------------------------------------------------------------------------------------------------------|-----------------------------------------------------------------------------------------------------------------------------------------------------------------------------------------------------------------------------------------------------------------------------------------------------------------------|
| Velocity/depth combinations                  | A greater variety of water velocity and depth combinations favour the presence and survival of organisms with different ecomorphological and habitat use characteristics.                                                                                                                                                                                                                                                                                                                                                                                                                                                    | Presence of the four regimes of water velocity and depth characterize a stretch in optimal condition: (1) fast / shallow, (2) slow / shallow, (3) fast / deep and (4) slow / deep; speed regimes are categorized as rapid when the water flow reaches more than 0.2 m/s and are deep when they reach more than 0.2 m. |
| Channel sinuosity                            | Higher sinuosity promotes greater availability of habitats for the aquatic communities, combined with the greater capacity of retention of fluctuations of flow caused by heavy rains. The absorption of energy by the curves protects the water course of excessive erosions and floods, and provides refuge for biota during storm events.                                                                                                                                                                                                                                                                                 | Presence of sharp and evident curves along the channel.                                                                                                                                                                                                                                                               |
| Water level amplitude                        | Channel-level fluctuations are related to the availability of substrate and other cover elements for aquatic communities.                                                                                                                                                                                                                                                                                                                                                                                                                                                                                                    | Proportion of substrates and cover elements submerged by water. It should be evaluated differently according to the time of year (dry and rainy season).                                                                                                                                                              |
| Channel integrity                            | Human-induced disturbances such as dikes, dredging, landfills, drainage, dams, pavement and flow diversion are contributing factors to disturbance in streams. Their presence promotes selectivity of more resistant species, hindering and even preventing the stabilization and maintenance of an environmental balance. The bank stability is closely associated with the presence of rooted vegetation, which promotes the cohesion of the sand particles and reduces the effects of erosion. In the study area, dominated by sandy soils, erosive processes can lead to the formation of ravines along the stream path. | Presence of channelization, dredging, bridges, dams and embankments.                                                                                                                                                                                                                                                  |
| Bank stability                               |                                                                                                                                                                                                                                                                                                                                                                                                                                                                                                                                                                                                                              | Presence and proportion of erosive processes, preserved vegetation and signs of detachment and substrate transport of ravines.                                                                                                                                                                                        |
| Bank vegetative protection                   | The riparian forests act as a physical barrier to contain nutrients from terrestrial environments, provide organic matter to the aquatic environment, buffer the temperature variations and contribute to the flow of energy between the environments. The composition of riparian vegetation depends on geological, geomorphological, hydrological, climatic and anthropogenic factors. Riparian forests with native and diverse composition, and in advanced stage of succession, provide greater protection to the system.                                                                                                | Presence and proportion of riparian vegetation along the stretch, considering a width of up to 15 meters from the stream margin.                                                                                                                                                                                      |
| Vegetation conservation on the riparian zone |                                                                                                                                                                                                                                                                                                                                                                                                                                                                                                                                                                                                                              | Presence and proportion of native species in good conservation status.                                                                                                                                                                                                                                                |

---

**Table S4.** Classification of sampled species according to their biological characteristics. Categories as follows: Origin (N = native, A = alien); Habitat guild (Preferred habitat for each fish species on water column position: B = benthopelagic, D = demersal); Reproductive guild (Reproductive habit for each fish species: IF = internal fertilization, PC = parental care behavior, N-PC = no parental care behavior); Tolerance (General tolerance to common anthropogenic, physical, and chemical stressors: I = intolerant, T = tolerant); Trophic guild (Primary source of nutrition for each fish species as an adult: Det = detritivore, Herb = herbivore, Ins = insectivore, Omn = omnivore, Pisc = piscivore).

| Fish Species                   | Origin          | Habitat Guild   | Reproductive Guild | Tolerance         | Trophic Guild       |
|--------------------------------|-----------------|-----------------|--------------------|-------------------|---------------------|
| <b>CHARACIFORMES</b>           |                 |                 |                    |                   |                     |
| <b>Characidae</b>              |                 |                 |                    |                   |                     |
| <i>Astyanax aff. fasciatus</i> | N <sup>15</sup> | B <sup>18</sup> | N-PC <sup>18</sup> | I <sup>13</sup>   | Ins <sup>1,8</sup>  |
| <i>Astyanax aff. paranae</i>   | N <sup>15</sup> | B <sup>18</sup> | N-PC <sup>18</sup> | I <sup>13</sup>   | Ins <sup>1,3</sup>  |
| <i>Astyanax lacustris</i>      | N <sup>15</sup> | B <sup>18</sup> | N-PC <sup>18</sup> | I <sup>13</sup>   | Omn <sup>1,2</sup>  |
| <i>Astyanax bockmanni</i>      | N <sup>15</sup> | B <sup>18</sup> | N-PC <sup>18</sup> | I <sup>13</sup>   | Herb <sup>4,7</sup> |
| <i>Moenkhausia forestii</i>    | N <sup>15</sup> | B <sup>18</sup> | N-PC <sup>18</sup> | I <sup>13*</sup>  | Ins <sup>3</sup>    |
| <i>Oligosarcus paranensis</i>  | N <sup>15</sup> | B <sup>18</sup> | N-PC <sup>18</sup> | I <sup>17,*</sup> | Ins <sup>10</sup>   |
| <i>Oligosarcus pintoii</i>     | N <sup>15</sup> | B <sup>18</sup> | N-PC <sup>18</sup> | I <sup>17,*</sup> | Ins <sup>2,11</sup> |
| <b>Cheirodontinae</b>          |                 |                 |                    |                   |                     |
| <i>Serrapinnus notomelas</i>   | N <sup>15</sup> | B <sup>18</sup> | N-PC <sup>18</sup> | T <sup>13</sup>   | Det <sup>2</sup>    |
| <b>Stevardiinae</b>            |                 |                 |                    |                   |                     |
| <i>Bryconamericus exodon</i>   | N <sup>15</sup> | B <sup>18</sup> | N-PC <sup>18</sup> | I <sup>14</sup>   | Ins <sup>5</sup>    |
| <i>Knodus moenkhausii</i>      | N <sup>15</sup> | B <sup>18</sup> | N-PC <sup>18</sup> | T <sup>13</sup>   | Ins <sup>2,3</sup>  |
| <i>Piabarchus stramineus</i>   | N <sup>15</sup> | B <sup>18</sup> | N-PC <sup>18</sup> | I <sup>14</sup>   | Omn <sup>1</sup>    |

|                                      |                    |                 |                                     |                  |                     |
|--------------------------------------|--------------------|-----------------|-------------------------------------|------------------|---------------------|
| <i>Piabina argentea</i>              | N <sup>15</sup>    | B <sup>18</sup> | N-PC <sup>18</sup>                  | I <sup>13</sup>  | Ins <sup>2,4</sup>  |
| <b>Crenuchidae</b>                   |                    |                 |                                     |                  |                     |
| <i>Characidium</i> aff. <i>zebra</i> | N <sup>15</sup>    | B <sup>18</sup> | N-PC <sup>18</sup>                  | I <sup>17</sup>  | Ins <sup>1,2</sup>  |
| <b>Erythrinidae</b>                  |                    |                 |                                     |                  |                     |
| <i>Hoplias</i> sp3.                  | N <sup>15</sup>    | B <sup>18</sup> | N-PC <sup>18</sup>                  | T <sup>17</sup>  | Pisc <sup>1,8</sup> |
| <b>Parodontidae</b>                  |                    |                 |                                     |                  |                     |
| <i>Parodon nasus</i>                 | N <sup>15</sup>    | B <sup>18</sup> | N-PC <sup>18</sup>                  | I <sup>13</sup>  | Det <sup>1</sup>    |
| <b>CICHLIFORMES</b>                  |                    |                 |                                     |                  |                     |
| <b>Cichlidae</b>                     |                    |                 |                                     |                  |                     |
| <i>Crenicichla britskii</i>          | N <sup>15</sup>    | B <sup>18</sup> | N-PC <sup>18</sup>                  | I <sup>13</sup>  | Ins <sup>2</sup>    |
| <b>CYPRINODONTIFORMES</b>            |                    |                 |                                     |                  |                     |
| <b>Poeciliidae</b>                   |                    |                 |                                     |                  |                     |
| <i>Phalloceros harpagos</i>          | N <sup>15,16</sup> | B <sup>18</sup> | IF <sup>11</sup> , PC <sup>18</sup> | T <sup>17</sup>  | Omn <sup>3,6</sup>  |
| <i>Poecilia reticulata</i>           | A <sup>15,16</sup> | B <sup>18</sup> | IF <sup>11</sup> , PC <sup>18</sup> | T <sup>13</sup>  | Det <sup>2,3</sup>  |
| <b>GYMNOTIFORMES</b>                 |                    |                 |                                     |                  |                     |
| <b>Gymnotidae</b>                    |                    |                 |                                     |                  |                     |
| <i>Gymnotus inaequilabiatus</i>      | N <sup>15</sup>    | B <sup>18</sup> | N-PC <sup>18</sup>                  | T <sup>13</sup>  | Ins <sup>3,4</sup>  |
| <i>Gymnotus sylvius</i>              | N <sup>15</sup>    | B <sup>18</sup> | N-PC <sup>18</sup>                  | T <sup>13*</sup> | Ins <sup>2</sup>    |
| <b>Sternopygidae</b>                 |                    |                 |                                     |                  |                     |
| <i>Sternopygus macrurus</i>          | N <sup>15</sup>    | B <sup>18</sup> | N-PC <sup>18</sup>                  | I <sup>16</sup>  | Ins <sup>9</sup>    |

| SILURIFORMES                       |                 |                 |                    |                    |                    |
|------------------------------------|-----------------|-----------------|--------------------|--------------------|--------------------|
| Callichthyidae                     |                 |                 |                    |                    |                    |
| <i>Callichthys callichthys</i>     | N <sup>15</sup> | D <sup>18</sup> | N-PC <sup>18</sup> | T <sup>17</sup>    | Det <sup>6</sup>   |
| <i>Corydoras aeneus</i>            | N <sup>15</sup> | D <sup>18</sup> | N-PC <sup>18</sup> | T <sup>12</sup>    | Ins <sup>2,3</sup> |
| Heptapteridae                      |                 |                 |                    |                    |                    |
| <i>Cetopsorhamdia iheringi</i>     | N <sup>15</sup> | D <sup>18</sup> | N-PC <sup>18</sup> | I <sup>14</sup>    | Ins <sup>4,7</sup> |
| <i>Imparfinis schubarti</i>        | N <sup>15</sup> | D <sup>18</sup> | N-PC <sup>18</sup> | I <sup>13</sup>    | Ins <sup>2,3</sup> |
| <i>Phenacorhamdia tenebrosa</i>    | N <sup>15</sup> | D <sup>18</sup> | N-PC <sup>18</sup> | I <sup>14</sup>    | Ins <sup>4,8</sup> |
| <i>Rhamdia quelen</i>              | N <sup>15</sup> | B <sup>18</sup> | N-PC <sup>18</sup> | T <sup>13,17</sup> | Ins <sup>2,3</sup> |
| Loricariidae                       |                 |                 |                    |                    |                    |
| Hypostominae                       |                 |                 |                    |                    |                    |
| <i>Hypostomus ancistroides</i>     | N <sup>15</sup> | D <sup>18</sup> | N-PC <sup>18</sup> | T <sup>13,17</sup> | Det <sup>2,7</sup> |
| <i>Hisonotus francirochai</i>      | N <sup>15</sup> | B <sup>18</sup> | N-PC <sup>18</sup> | I <sup>13</sup>    | Det <sup>2</sup>   |
| <i>Rineloricaria pentamaculata</i> | N <sup>15</sup> | D <sup>18</sup> | N-PC <sup>18</sup> | T <sup>17,*</sup>  | Ins <sup>7</sup>   |
| Trichomycteridae                   |                 |                 |                    |                    |                    |
| <i>Trichomycterus davisi</i>       | N <sup>15</sup> | B <sup>18</sup> | N-PC <sup>18</sup> | I <sup>17,*</sup>  | Ins <sup>3,6</sup> |
| SYNBRANCHIFORMES                   |                 |                 |                    |                    |                    |
| Synbranchidae                      |                 |                 |                    |                    |                    |
| <i>Synbranchus marmoratus</i>      | N <sup>15</sup> | D <sup>18</sup> | N-PC <sup>18</sup> | T <sup>17</sup>    | Ins <sup>3</sup>   |

Modified from Pereira, 2016. <sup>1</sup>Smith et al., 2013; <sup>2</sup>Zeni; Casatti, 2014; <sup>3</sup>Cionek, 2016; <sup>4</sup>Silva, 2013; <sup>5</sup>Novakowski et al., 2008; <sup>6</sup>Abilhoa et al., 2008; <sup>7</sup>Silva et al., 2012; <sup>8</sup>Ferreira, 2007; <sup>9</sup>Luz-Agostinho et al., 2006; <sup>10</sup>Esteves et al., 2008; <sup>11</sup>Casatti, 2002; <sup>12</sup>Araújo; Garutti, 2003; <sup>13</sup>Casatti et al., 2009; <sup>14</sup>Casatti et al., 2012; <sup>15</sup>Graça; Pavanelli, 2007; <sup>16</sup>Petry et al., 2013; <sup>17</sup>Bozzetti; Schulz, 2004; <sup>18</sup>Froese; Pauly, 2019. \*The classification of these species followed its genus pattern.

1 **Table S5.** Candidate metrics for the N3S-IBI. Total metrics (227) were calculated using standardized  
 2 measures of number, biomass and proportion of taxa or individuals.

| Metric                                     |
|--------------------------------------------|
| Diversity                                  |
| Shannon index                              |
| Simpson's dominance (1 – D)                |
| Total richness                             |
| Abundance                                  |
| Biomass of fish                            |
| Number of fish                             |
| Composition (Individuals)                  |
| <i>A. aff. fasciatus</i>                   |
| <i>A. aff. paranae</i>                     |
| <i>A. bockmanni</i>                        |
| <i>A. lacustris</i>                        |
| <i>B. exodon</i>                           |
| <i>C. aeneus</i>                           |
| <i>C. britskii</i>                         |
| <i>C. callichthys</i>                      |
| <i>C. iheringi</i>                         |
| <i>C. aff. zebra</i>                       |
| <i>G. inaequilabiatus</i>                  |
| <i>G. sylvius</i>                          |
| <i>H. ancistroides</i>                     |
| <i>H. francirochai</i>                     |
| <i>Hoplias sp3</i>                         |
| <i>I. schubarti</i>                        |
| <i>K. moenkhausii</i>                      |
| <i>M. forestii</i>                         |
| <i>O. paranensis</i>                       |
| <i>O. pinto</i>                            |
| <i>P. argentea</i>                         |
| <i>P. harpagos</i>                         |
| <i>P. nasus</i>                            |
| <i>P. reticulata</i>                       |
| <i>P. stramineus</i>                       |
| <i>P. tenebrosa</i>                        |
| <i>R. pentamaculata</i>                    |
| <i>R. quelen</i>                           |
| <i>S. macrurus</i>                         |
| <i>S. marmoratus</i>                       |
| <i>S. notomelas</i>                        |
| <i>T. davis</i>                            |
| Characiformes less tolerant                |
| Characiformes + Siluriformes               |
| Characiformes + Siluriformes less tolerant |
| Characiformes                              |
| Siluriformes less tolerant                 |
| Siluriformes                               |
| Synbranchiiformes                          |
| Characidae                                 |
| Loricariidae                               |



|                                            |
|--------------------------------------------|
| Heptapteridae                              |
| Composition (Family/Order)                 |
| Characiformes                              |
| Cichliformes                               |
| Cyprinodontiformes                         |
| Gymnotiformes                              |
| Siluriformes                               |
| Characiformes + siluriformes               |
| Characiformes less tolerant                |
| Characiformes + Siluriformes less tolerant |
| Siluriformes less tolerant                 |
| Characidae                                 |
| Loricariidae                               |
| Heptapteridae                              |
| Origin                                     |
| Alien                                      |
| Native                                     |
| Habitat guild                              |
| Benthopelagic                              |
| Demersal                                   |
| Benthopelagic less tolerant                |
| Demersal less tolerant                     |
| Reproductive Guild                         |
| With parental care                         |
| Without parental care                      |
| External reproduction                      |
| Internal reproduction                      |
| Without parental care less tolerant        |
| Tolerance                                  |
| Intolerant                                 |
| Tolerant                                   |
| Richness of intolerant                     |
| Richness of tolerant                       |
| Trophic Guild                              |
| detritivore                                |
| herbivore                                  |
| insectivore                                |
| omnivore                                   |
| piscivore                                  |
| detritivore less tolerant                  |
| insectivore less tolerant                  |
| omnivore less tolerant                     |

**Table S6.** RAP metrics. LM – left margin; RM – right margin.

| Stream | Underwater<br>available<br>cover | Underwater<br>habitat<br>complexity | Velocity/depth<br>combinations | Channel<br>sinuosity | Water<br>level<br>amplitude | Channel<br>integrity | Bank<br>stability –<br>LM | Bank<br>stability –<br>RM | Bank<br>vegetative<br>protection –<br>LM | Bank<br>vegetative<br>protection –<br>RM | Vegetation<br>conservation<br>- LM | Vegetation<br>conservation<br>- RM | RAP |
|--------|----------------------------------|-------------------------------------|--------------------------------|----------------------|-----------------------------|----------------------|---------------------------|---------------------------|------------------------------------------|------------------------------------------|------------------------------------|------------------------------------|-----|
| s01    | 18                               | 17                                  | 4                              | 6                    | 6                           | 7                    | 7                         | 7                         | 6                                        | 6                                        | 5                                  | 5                                  | 94  |
| s02    | 11                               | 14                                  | 15                             | 16                   | 19                          | 20                   | 9                         | 9                         | 6                                        | 6                                        | 5                                  | 5                                  | 135 |
| s03    | 1                                | 3                                   | 6                              | 16                   | 7                           | 16                   | 3                         | 3                         | 3                                        | 3                                        | 0                                  | 0                                  | 61  |
| s04    | 15                               | 15                                  | 15                             | 20                   | 20                          | 20                   | 8                         | 7                         | 8                                        | 7                                        | 8                                  | 7                                  | 150 |
| s05    | 10                               | 10                                  | 10                             | 15                   | 15                          | 15                   | 6                         | 5                         | 6                                        | 5                                        | 6                                  | 5                                  | 108 |
| s07    | 4                                | 5                                   | 8                              | 17                   | 12                          | 18                   | 3                         | 3                         | 3                                        | 3                                        | 0                                  | 0                                  | 76  |
| s08    | 5                                | 5                                   | 9                              | 8                    | 14                          | 20                   | 9                         | 9                         | 4                                        | 4                                        | 5                                  | 5                                  | 97  |
| s09    | 1                                | 3                                   | 3                              | 10                   | 6                           | 2                    | 1                         | 1                         | 2                                        | 2                                        | 3                                  | 3                                  | 37  |
| s10    | 11                               | 11                                  | 12                             | 8                    | 11                          | 18                   | 8                         | 7                         | 8                                        | 7                                        | 6                                  | 8                                  | 115 |
| s11    | 9                                | 7                                   | 5                              | 4                    | 7                           | 19                   | 5                         | 6                         | 4                                        | 5                                        | 3                                  | 5                                  | 79  |
| s12    | 11                               | 6                                   | 2                              | 10                   | 4                           | 3                    | 4                         | 4                         | 4                                        | 4                                        | 3                                  | 3                                  | 58  |
| s13    | 16                               | 16                                  | 15                             | 15                   | 19                          | 20                   | 7                         | 8                         | 8                                        | 8                                        | 8                                  | 8                                  | 148 |
| s14    | 17                               | 16                                  | 18                             | 17                   | 13                          | 12                   | 4                         | 4                         | 4                                        | 4                                        | 3                                  | 3                                  | 115 |
| s15    | 12                               | 5                                   | 7                              | 6                    | 11                          | 17                   | 7                         | 8                         | 3                                        | 3                                        | 3                                  | 4                                  | 86  |
| s17    | 1                                | 3                                   | 5                              | 9                    | 8                           | 12                   | 3                         | 4                         | 3                                        | 3                                        | 4                                  | 4                                  | 59  |
| s18    | 3                                | 2                                   | 7                              | 5                    | 7                           | 16                   | 2                         | 2                         | 3                                        | 3                                        | 5                                  | 5                                  | 60  |
| s20    | 18                               | 16                                  | 15                             | 20                   | 19                          | 20                   | 9                         | 9                         | 9                                        | 9                                        | 8                                  | 8                                  | 160 |
| s21    | 17                               | 17                                  | 16                             | 19                   | 17                          | 20                   | 10                        | 10                        | 9                                        | 8                                        | 10                                 | 9                                  | 162 |
| s22    | 16                               | 15                                  | 13                             | 13                   | 11                          | 19                   | 5                         | 4                         | 5                                        | 5                                        | 5                                  | 5                                  | 116 |
| s23    | 11                               | 11                                  | 13                             | 13                   | 13                          | 13                   | 3                         | 4                         | 2                                        | 2                                        | 3                                  | 3                                  | 91  |
| s24    | 7                                | 7                                   | 7                              | 5                    | 8                           | 18                   | 7                         | 7                         | 5                                        | 5                                        | 5                                  | 5                                  | 86  |
| s25    | 7                                | 3                                   | 12                             | 13                   | 12                          | 13                   | 4                         | 4                         | 5                                        | 5                                        | 4                                  | 4                                  | 86  |
| s27    | 11                               | 15                                  | 12                             | 13                   | 12                          | 20                   | 5                         | 5                         | 5                                        | 5                                        | 7                                  | 7                                  | 117 |

**Table S7.** Rapid Assessment Protocol – Field Spreadsheet.

Location: \_\_\_\_\_

Evaluator: \_\_\_\_\_

Date: \_\_\_\_ / \_\_\_\_ / \_\_\_\_

General observations (i.e.: rainy day, cloudy day, new fallen trees, new flow disruption, or any observation important for data interpretation): \_\_\_\_\_

| Underwater Available Cover                                                                                                                                                       |    |    |    |    |                                                                                                                                                                                 |    |    |    |    |                                                                                                                                                                                                          |   |   |   |   |                                                                                                                                                                                                                                   |   |   |   |   |   |
|----------------------------------------------------------------------------------------------------------------------------------------------------------------------------------|----|----|----|----|---------------------------------------------------------------------------------------------------------------------------------------------------------------------------------|----|----|----|----|----------------------------------------------------------------------------------------------------------------------------------------------------------------------------------------------------------|---|---|---|---|-----------------------------------------------------------------------------------------------------------------------------------------------------------------------------------------------------------------------------------|---|---|---|---|---|
| Categories                                                                                                                                                                       |    |    |    |    |                                                                                                                                                                                 |    |    |    |    |                                                                                                                                                                                                          |   |   |   |   |                                                                                                                                                                                                                                   |   |   |   |   |   |
| Optimal                                                                                                                                                                          |    |    |    |    | Good                                                                                                                                                                            |    |    |    |    | Regular                                                                                                                                                                                                  |   |   |   |   | Poor                                                                                                                                                                                                                              |   |   |   |   |   |
| Stream reach presents 76% to 100% of potential cover, such as trunks, branches and leaves fallen into the water, underwater aquatic vegetation and decomposing organic material. |    |    |    |    | Stream reach presents 51% to 75% of potential cover, such as trunks, branches and leaves fallen into the water, underwater aquatic vegetation and decomposing organic material. |    |    |    |    | Stream reach presents 26% to 50% of potential cover, such as trunks, branches and leaves fallen into the water. Absence or minimum occurrence of decomposing organic material and underwater vegetation. |   |   |   |   | Clear dominance of sand. Flow velocity carrying away branches and leaves and limiting the establishment of underwater aquatic vegetation or decomposing organic material. Stream reach presents less than 25% of potential cover. |   |   |   |   |   |
| 20                                                                                                                                                                               | 19 | 18 | 17 | 16 | 15                                                                                                                                                                              | 14 | 13 | 12 | 11 | 10                                                                                                                                                                                                       | 9 | 8 | 7 | 6 | 5                                                                                                                                                                                                                                 | 4 | 3 | 2 | 1 | 0 |

| Underwater Habitat Complexity                                                                                                                                                                                                        |    |    |    |    |                                                                                                                                                                                                                                     |    |    |    |    |                                                                                                                                                                                                                                     |   |   |   |   |                                                                                                                                                                                                                                |   |   |   |   |   |
|--------------------------------------------------------------------------------------------------------------------------------------------------------------------------------------------------------------------------------------|----|----|----|----|-------------------------------------------------------------------------------------------------------------------------------------------------------------------------------------------------------------------------------------|----|----|----|----|-------------------------------------------------------------------------------------------------------------------------------------------------------------------------------------------------------------------------------------|---|---|---|---|--------------------------------------------------------------------------------------------------------------------------------------------------------------------------------------------------------------------------------|---|---|---|---|---|
| Categories                                                                                                                                                                                                                           |    |    |    |    |                                                                                                                                                                                                                                     |    |    |    |    |                                                                                                                                                                                                                                     |   |   |   |   |                                                                                                                                                                                                                                |   |   |   |   |   |
| Optimal                                                                                                                                                                                                                              |    |    |    |    | Good                                                                                                                                                                                                                                |    |    |    |    | Regular                                                                                                                                                                                                                             |   |   |   |   | Poor                                                                                                                                                                                                                           |   |   |   |   |   |
| Reaches with aquatic vegetation, marginal vegetation, small waterfalls, excavated banks, backwaters, and branches and leaves fallen into the water covering from 76% up to 100% of the stream reach, as potential habitat for fauna. |    |    |    |    | Reaches with aquatic vegetation, marginal vegetation, small waterfalls, excavated banks, backwaters, and branches and leaves fallen into the water covering from 51% up to 75% of the stream reach, as potential habitat for fauna. |    |    |    |    | Reaches with aquatic vegetation, marginal vegetation, small waterfalls, excavated banks, backwaters, and branches and leaves fallen into the water covering from 26% up to 50% of the stream reach, as potential habitat for fauna. |   |   |   |   | Reaches with aquatic vegetation, marginal vegetation, small waterfalls, excavated banks, backwaters, and branches and leaves fallen into the water covering less than 25% of the stream reach, as potential habitat for fauna. |   |   |   |   |   |
| 20                                                                                                                                                                                                                                   | 19 | 18 | 17 | 16 | 15                                                                                                                                                                                                                                  | 14 | 13 | 12 | 11 | 10                                                                                                                                                                                                                                  | 9 | 8 | 7 | 6 | 5                                                                                                                                                                                                                              | 4 | 3 | 2 | 1 | 0 |

| Velocity/depth Combinations |  |  |  |  |  |  |  |  |  |  |  |  |  |  |  |  |  |  |  |
|-----------------------------|--|--|--|--|--|--|--|--|--|--|--|--|--|--|--|--|--|--|--|
|-----------------------------|--|--|--|--|--|--|--|--|--|--|--|--|--|--|--|--|--|--|--|

| Categories                                                                                    |    |    |    |    |                                                                              |    |    |    |    |                                                                                             |   |   |   |   |                                                                          |   |   |   |   |   |
|-----------------------------------------------------------------------------------------------|----|----|----|----|------------------------------------------------------------------------------|----|----|----|----|---------------------------------------------------------------------------------------------|---|---|---|---|--------------------------------------------------------------------------|---|---|---|---|---|
| Optimal                                                                                       |    |    |    |    | Good                                                                         |    |    |    |    | Regular                                                                                     |   |   |   |   | Poor                                                                     |   |   |   |   |   |
| Sites with the presence of 4 combinations: fast/shallow; fast/ deep; slow/shallow; slow/deep. |    |    |    |    | Sites with the presence of 3 combinations; the fast/shallow must be present. |    |    |    |    | Sites with the presence of 2 combinations; if fast/shallow is absent, scores must be lower. |   |   |   |   | Prevalence of 1 type; if slow regime predominates, scores must be lower. |   |   |   |   |   |
| 20                                                                                            | 19 | 18 | 17 | 16 | 15                                                                           | 14 | 13 | 12 | 11 | 10                                                                                          | 9 | 8 | 7 | 6 | 5                                                                        | 4 | 3 | 2 | 1 | 0 |

| Channel Sinuosity                                              |    |    |    |    |                                                             |    |    |    |    |                                                      |   |   |   |   |                                                                           |   |   |   |   |   |
|----------------------------------------------------------------|----|----|----|----|-------------------------------------------------------------|----|----|----|----|------------------------------------------------------|---|---|---|---|---------------------------------------------------------------------------|---|---|---|---|---|
| Optimal                                                        |    |    |    |    | Good                                                        |    |    |    |    | Regular                                              |   |   |   |   | Poor                                                                      |   |   |   |   |   |
| Occurrence of sharp and evident curves along the stream reach. |    |    |    |    | Stream reach sinuosity is not evident, with distant curves. |    |    |    |    | Stream reach with a few, smooth and distant curves . |   |   |   |   | Stream reach is straight. If stream is channelized, scores must be lower. |   |   |   |   |   |
| 20                                                             | 19 | 18 | 17 | 16 | 15                                                          | 14 | 13 | 12 | 11 | 10                                                   | 9 | 8 | 7 | 6 | 5                                                                         | 4 | 3 | 2 | 1 | 0 |

| Water Level Amplitude – Rainy Season                             |    |    |    |    |                                                                                                                                                      |    |    |    |    |                                                                                                                                                                  |   |   |   |   |                                                                                                     |   |   |   |   |   |
|------------------------------------------------------------------|----|----|----|----|------------------------------------------------------------------------------------------------------------------------------------------------------|----|----|----|----|------------------------------------------------------------------------------------------------------------------------------------------------------------------|---|---|---|---|-----------------------------------------------------------------------------------------------------|---|---|---|---|---|
| Optimal                                                          |    |    |    |    | Good                                                                                                                                                 |    |    |    |    | Regular                                                                                                                                                          |   |   |   |   | Poor                                                                                                |   |   |   |   |   |
| Water level covers all available habitats for the aquatic fauna. |    |    |    |    | Water level covers up to 75% of the stream channel, and less than 25% of substrates and cover elements available for fauna colonization are exposed. |    |    |    |    | Water level covers between 26% up to 75% of the stream channel, and less than 25% of substrates and cover elements available for fauna colonization are exposed. |   |   |   |   | Water level is critical, with reduced water flux; most of the flow rate is standing water in wells. |   |   |   |   |   |
| 20                                                               | 19 | 18 | 17 | 16 | 15                                                                                                                                                   | 14 | 13 | 12 | 11 | 10                                                                                                                                                               | 9 | 8 | 7 | 6 | 5                                                                                                   | 4 | 3 | 2 | 1 | 0 |

| Water Level Amplitude – Dry Season                               |  |  |  |  |                                                                                                                                                      |  |  |  |  |                                                                                                                                                                  |  |  |  |  |                              |  |  |  |  |  |
|------------------------------------------------------------------|--|--|--|--|------------------------------------------------------------------------------------------------------------------------------------------------------|--|--|--|--|------------------------------------------------------------------------------------------------------------------------------------------------------------------|--|--|--|--|------------------------------|--|--|--|--|--|
| Optimal                                                          |  |  |  |  | Good                                                                                                                                                 |  |  |  |  | Regular                                                                                                                                                          |  |  |  |  | Poor                         |  |  |  |  |  |
| Water level covers all available habitats for the aquatic fauna. |  |  |  |  | Water level covers up to 75% of the stream channel, and less than 25% of substrates and cover elements available for fauna colonization are exposed. |  |  |  |  | Water level covers between 26% up to 75% of the stream channel, and less than 25% of substrates and cover elements available for fauna colonization are exposed. |  |  |  |  | Stream reach completely dry. |  |  |  |  |  |
|                                                                  |  |  |  |  | 20                                                                                                                                                   |  |  |  |  | 19 18 17 16 15 14 13 12 11 10                                                                                                                                    |  |  |  |  | 0                            |  |  |  |  |  |



| Vegetation Conservation on the Riparian Zone                                      |    |   |                                                                                                                                              |   |   |                                                                                                             |   |   |                                                                                                                                                       |   |   |
|-----------------------------------------------------------------------------------|----|---|----------------------------------------------------------------------------------------------------------------------------------------------|---|---|-------------------------------------------------------------------------------------------------------------|---|---|-------------------------------------------------------------------------------------------------------------------------------------------------------|---|---|
| Categories                                                                        |    |   |                                                                                                                                              |   |   |                                                                                                             |   |   |                                                                                                                                                       |   |   |
| Optimal                                                                           |    |   | Good                                                                                                                                         |   |   | Regular                                                                                                     |   |   | Poor                                                                                                                                                  |   |   |
| Surrounding vegetation composed by native species, in a good conservation status. |    |   | Vegetation composed by native (dominant) and non-native species. It presents a good conservation status, with minimum anthropogenic impacts. |   |   | Dominance of non-native species; minimal presence of native species is associated to anthropogenic impacts. |   |   | Absence of native vegetation giving rise to invasive species; pressure factors include the removal of native species, opening of trails and burnings. |   |   |
| LM                                                                                | 10 | 9 | 8                                                                                                                                            | 7 | 6 | 5                                                                                                           | 4 | 3 | 2                                                                                                                                                     | 1 | 0 |
| RM                                                                                | 10 | 9 | 8                                                                                                                                            | 7 | 6 | 5                                                                                                           | 4 | 3 | 2                                                                                                                                                     | 1 | 0 |

\*LM = left margin. RM = right margin. The sum of both margins provides this parameter scores.
